# Supplementary material for: Modulating Endoplasmic Reticulum Chaperones and Mutant Protein Degradation in GABRG2(Q390X) Associated with Genetic Epilepsy with Febrile Seizures Plus and Dravet Syndrome
Source: MDPI journal article supplement (doi:10.3390/ijms25094601), 2024-04-23

# Supplementary Figure 1: Differential effect of E3 ubiquitin ligases on expression of the $\gamma 2$ or $\gamma 2(Q390X)$ subunits

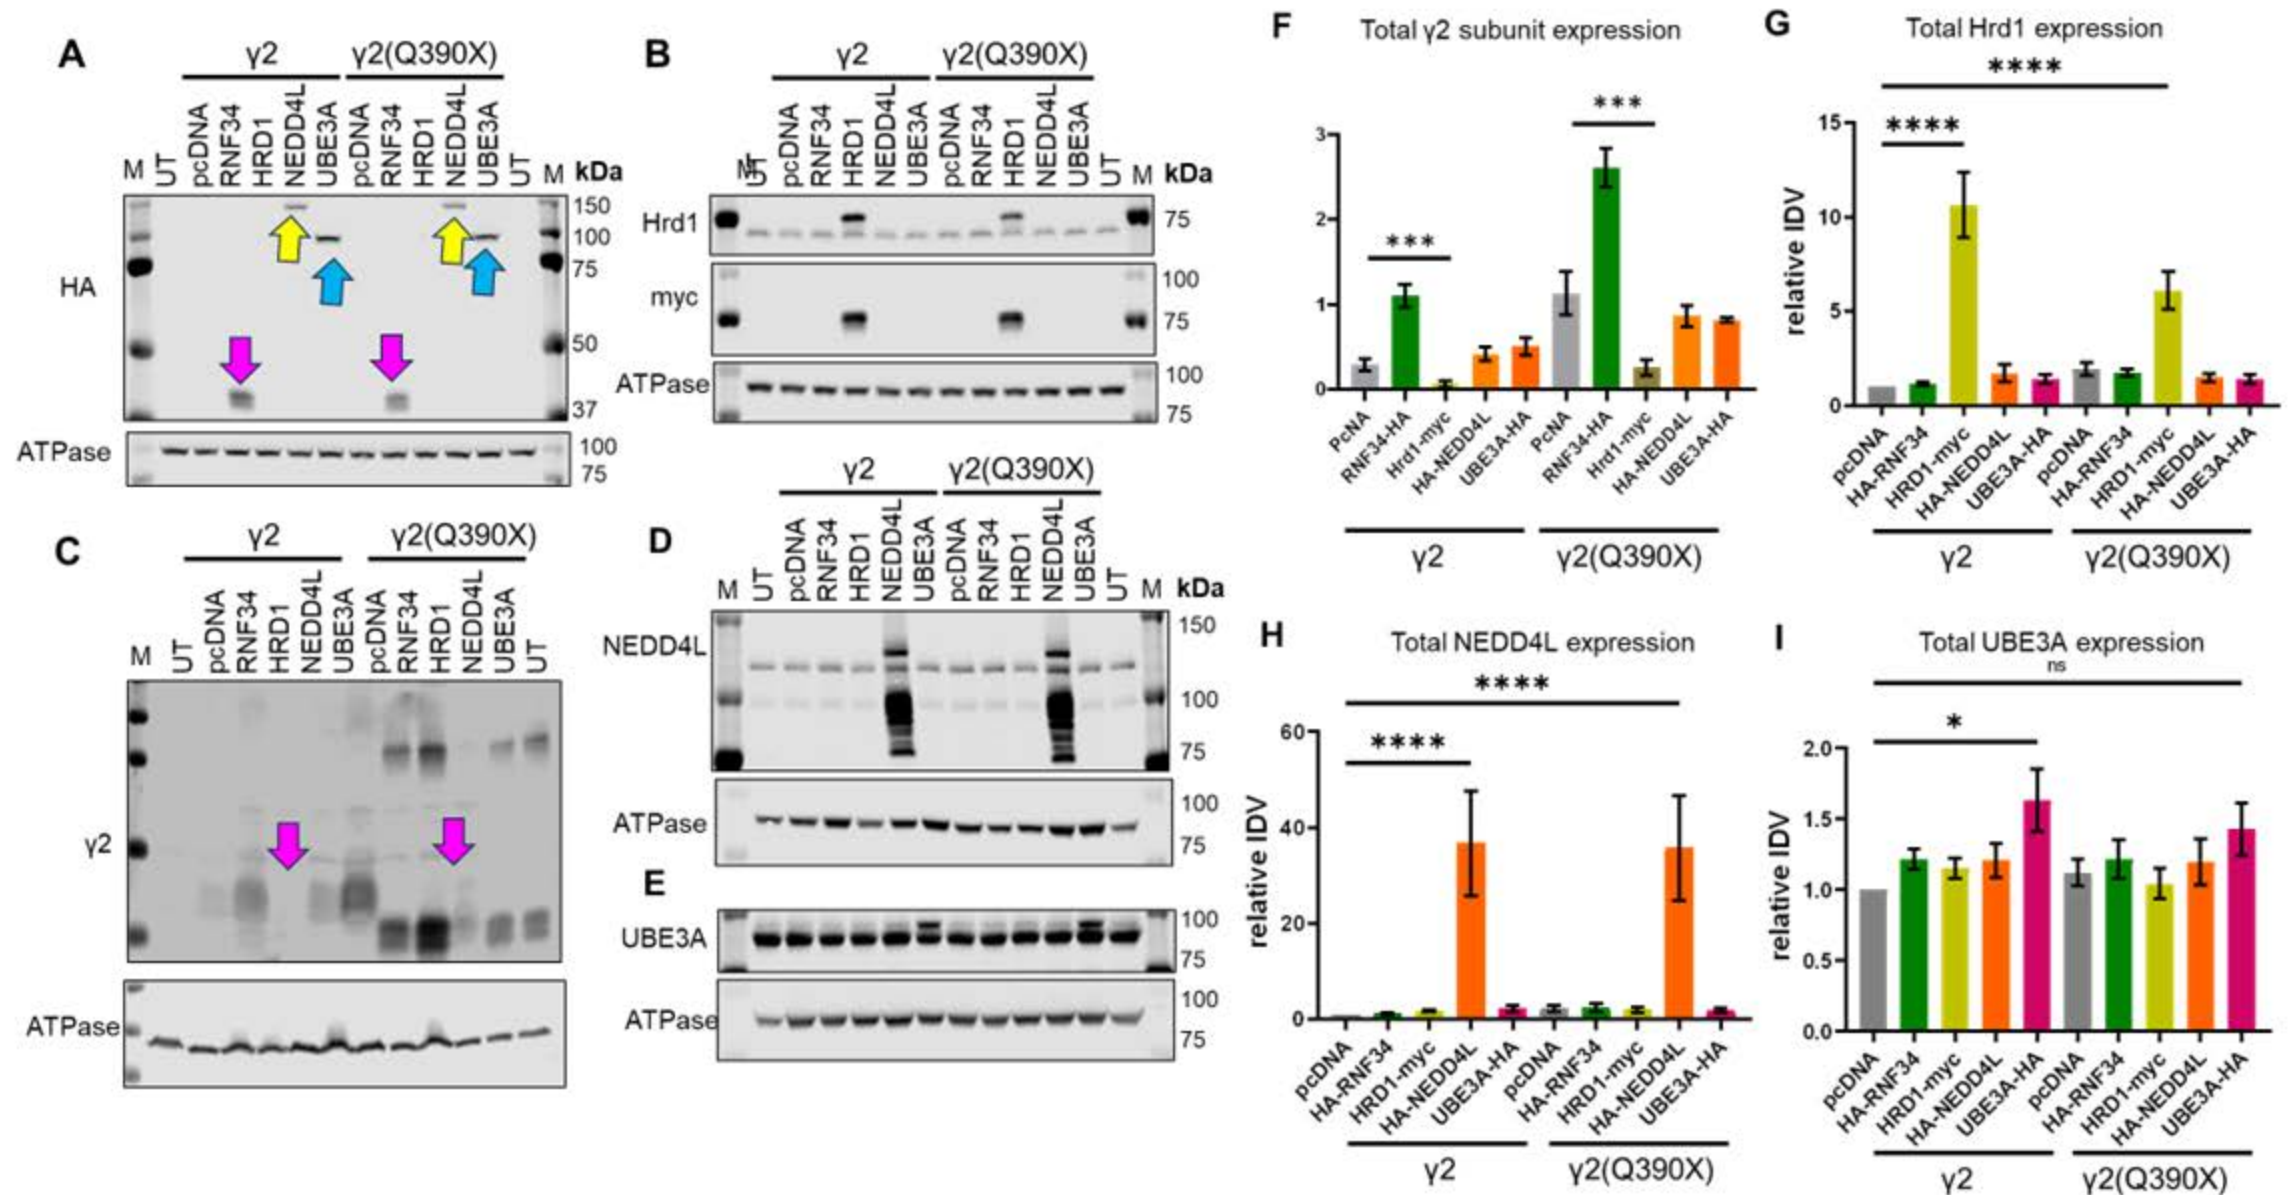

Supplementary Figure 2: ERAD component HRD1 modulate the degradation of the mutant  $\gamma 2(Q390X)$  subunit protein

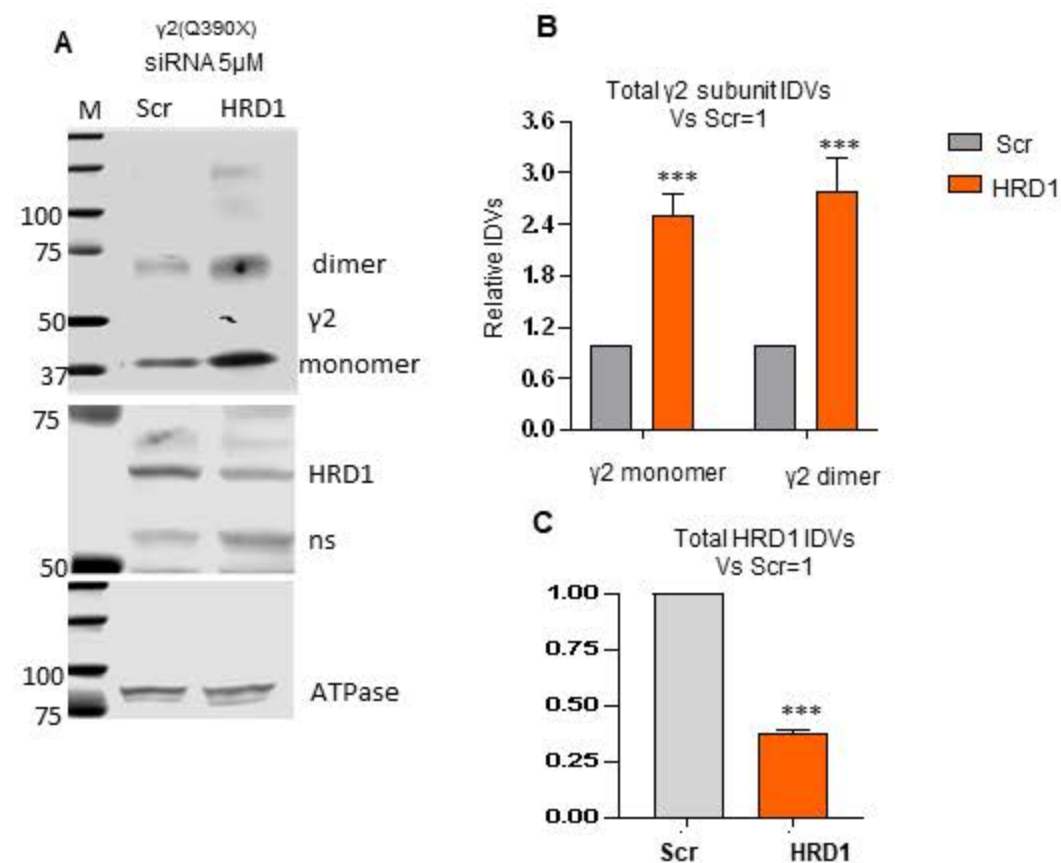

Supplementary Figure 3: ZNS did not altered  $\beta 2$  subunit expression in *Gabrg2*<sup>+/*Q390X*</sup> mice

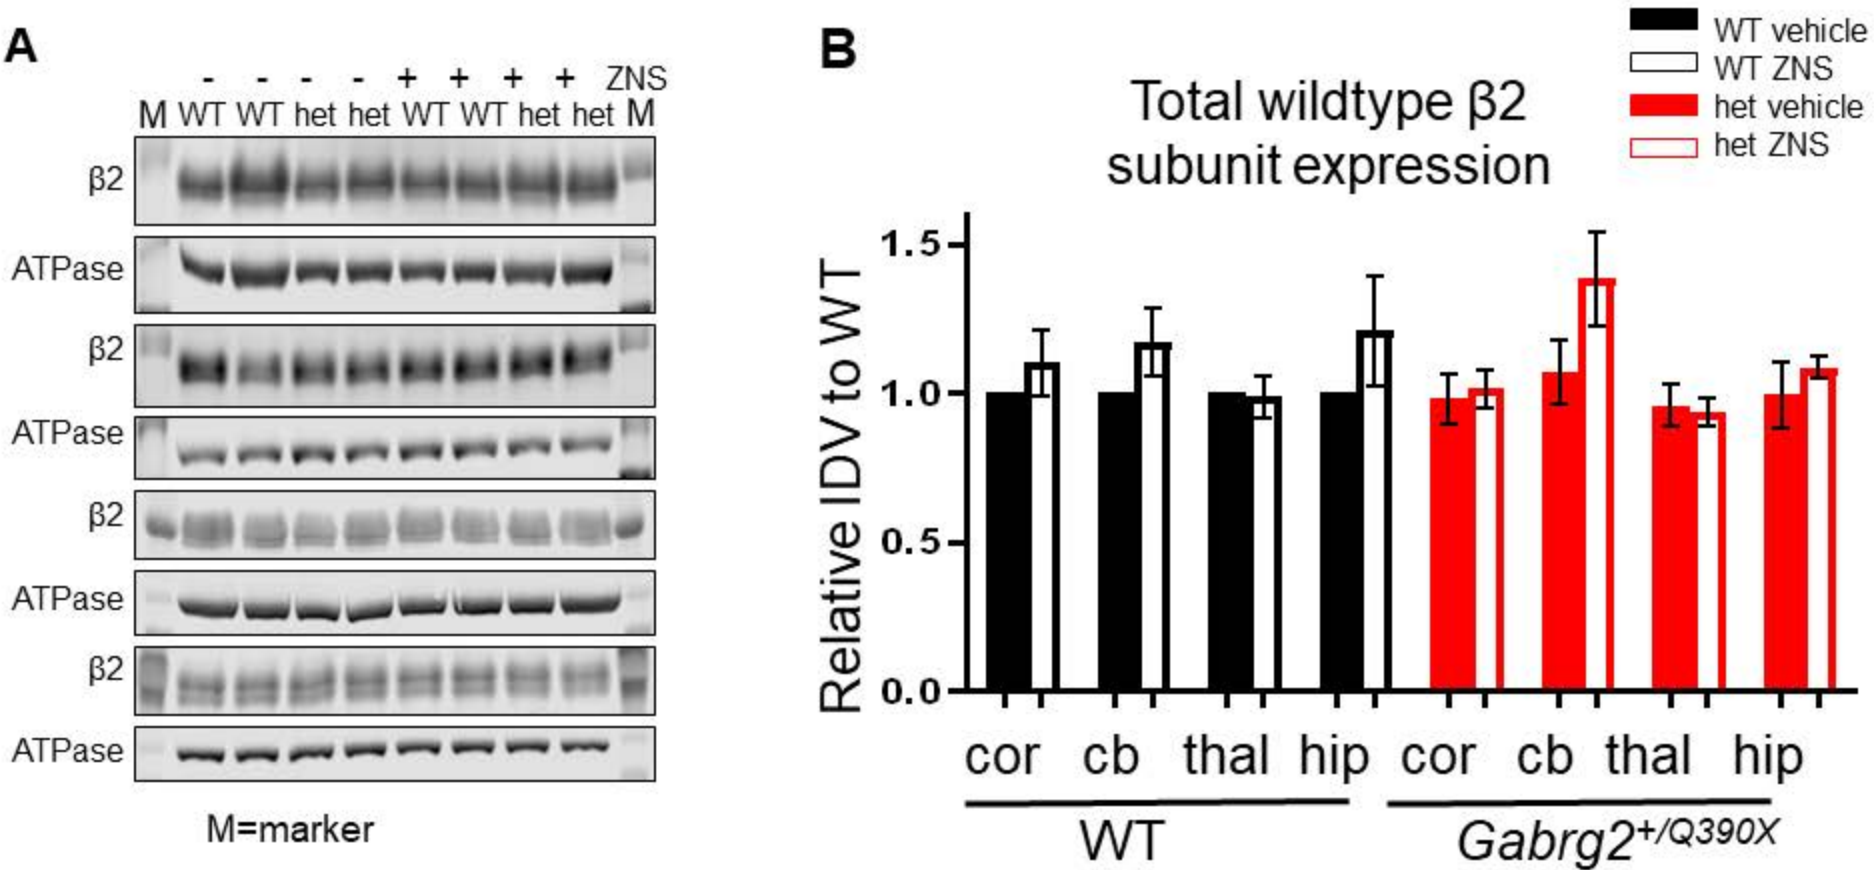

# Supplementary Figure 4: ZNS did not alter Hrd1 or Sel1L expression in *Gabrg2*<sup>+/-Q390X</sup>

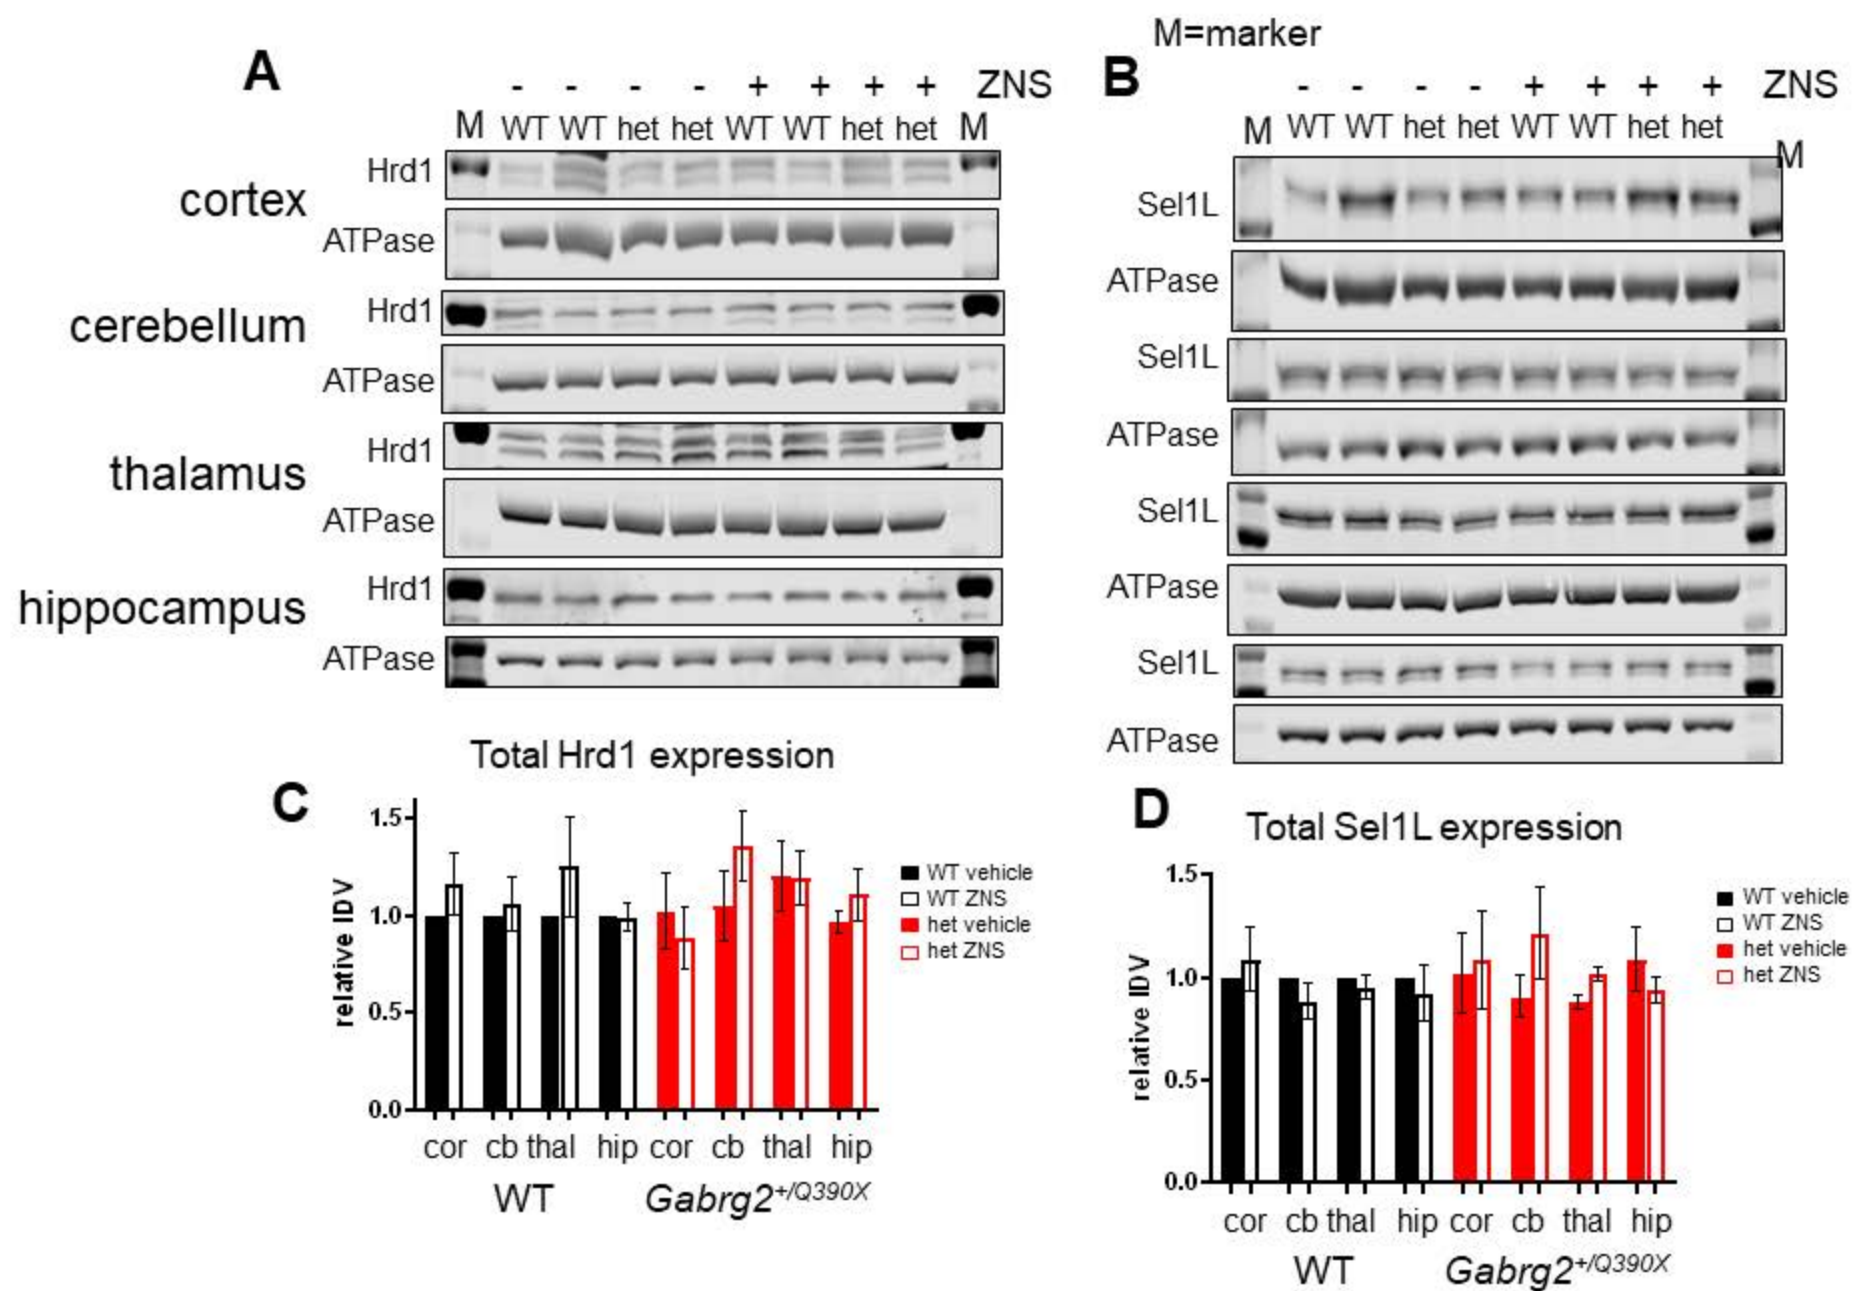

Supplement: s1 [file s1]
